# Supplementary material for: Glucose negatively affects Nrf2/SKN-1-mediated innate immunity in C. elegans
Source: publisher site journal article supplement (doi:10.18632/aging.101610), 2018-11-15
Supplement: Supplementary file [file aging-v10i11-101610-supplementary-material-SD1.pdf]

SUPPLEMENTARY FIGURES

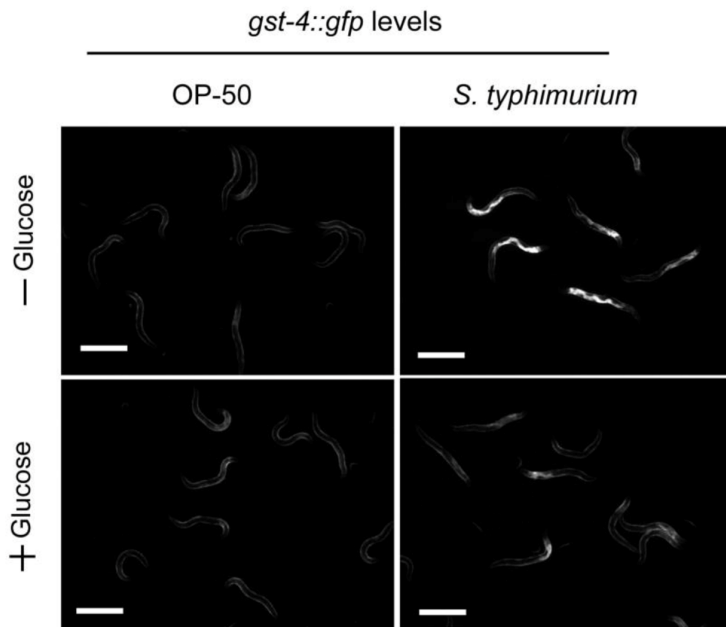

**Figure S1. (Related to Figure 2A) Glucose reduces *gst-GFP* levels in response to *S. typhimurium* but not non-pathogenic OP-50 bacteria.** *C. elegans* expressing the SKN-1 reporter *gst-4::gfp* were cultured on OP-50 bacteria in medium supplemented with and without 0.5% glucose from L1 stage to L4/young adult stage, then transferred to plates with either OP-50 bacteria plate or *S. typhimurium* bacteria for 2 days for infection. Images were then taken with Leica microscope under GFP channel. Scale bars are 600  $\mu$ m.

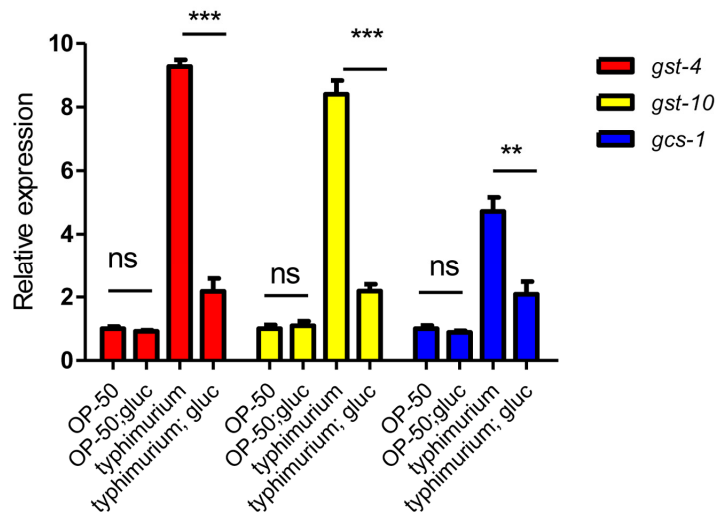

**Figure S2. (Related to Figure 2C) glucose specifically affect *S. typhimurium* activation of SKN-1 target genes.** Animals raised on medium with and without glucose from L1 to L4/young adult stage were infected with and without *S. typhimurium* for 2 days. mRNA were extracted and reverse transcribed to cDNA. Quantitative RT-PCR of SKN-1 target genes (*gst-4*, *gst-10*, *gcs-1*) was conducted using established primer sets and protocols. Shown are representative data from 1 of 2 independent experiments. Error bars indicate standard error of the mean (SEM) of 3 replicates. P values were obtained by student's t-test. \*\*, P<0.001; \*\*\*, P<0.0001; ns, not significant.

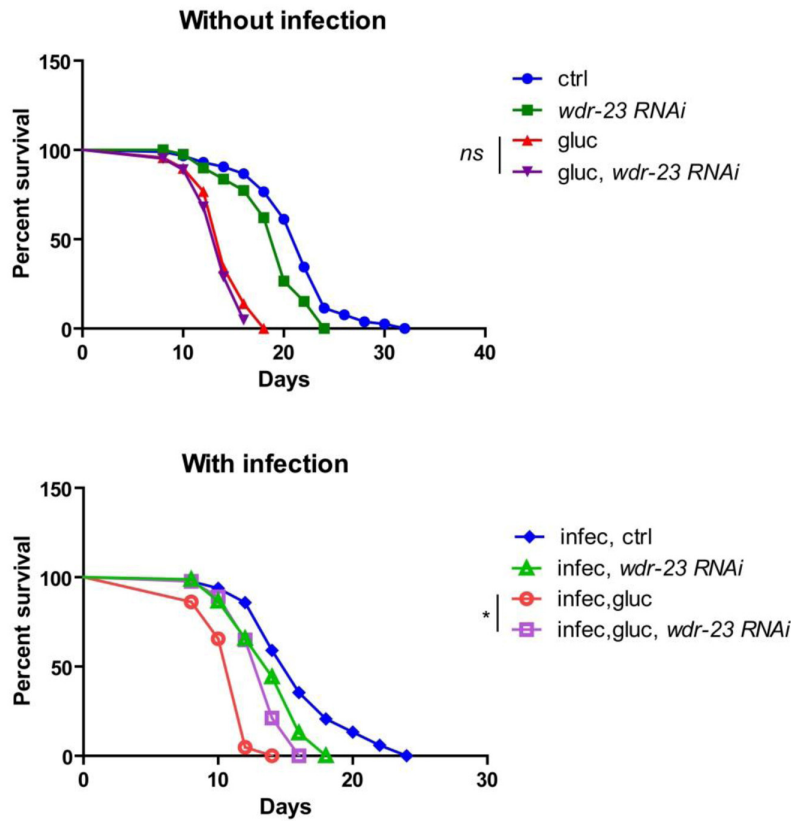

**Figure S3. (Related to Figure 4D) *wdr-23* RNAi cannot attenuate glucose’s negative effect on lifespan of non-infected *C. elegans*.** Lifespan and infection were carried out at 20 °C. Animals fed bacteria expressing double-stranded RNA of *wdr-23* from L1 stage to L4/young adult stage on medium with and without glucose were infected with *S. typhimurium* for 2 days. Worms were then transferred to non-infected RNAi bacterial plates. Survival was recorded every other day until all worms died. number of worms >100 for each sample. See Table S5 for details. ns, not significant, \* P<0.01.

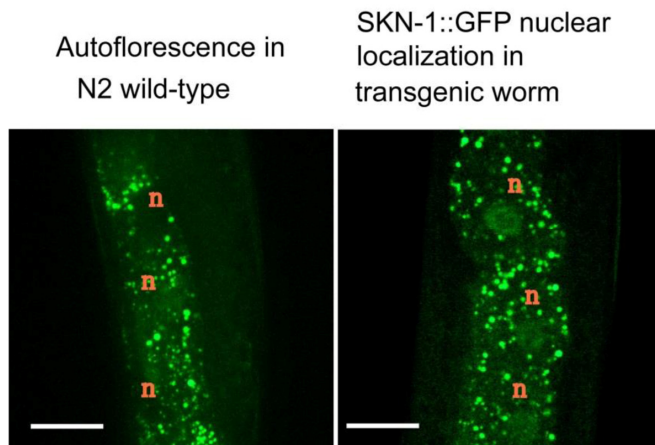

**Figure S4. (Related to Figure 2D) The punctate signals are auto-fluorescence in the intestine of *C. elegans*.** Animals without (left) and with SKN-1::GFP transgenes (right) were raised on medium with and without glucose from L1 stage to L4/young adult stag, then infected with *S. typhimurium* for 2 days before imaging. “n” marks above the nucleus of intestinal cells. Scale bars are 40 μm.
